# Supplementary material
Source: MDPI journal article supplement (https://www.mdpi.com/2673-9992/4/1/10)
Supplement: s1 [file s1]

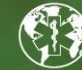

# Mental health and resilience during the COVID-19 pandemic among Spanish residents: Do age and gender matter? An exploratory study

Pilar Martín-Hernández <sup>1\*</sup>

<sup>1</sup> Department of Psychology and Sociology, Faculty of Human and Social Sciences, University of Zaragoza

\* Correspondence: [pimartin@unizar.es](mailto:pimartin@unizar.es)

# INTRODUCTION

- Since the WHO designated the COVID-19 outbreak as a global pandemic in March 2020, Spain is one of the top ten countries around the world with the highest number of infected people.
- The COVID-19 pandemic not only damages individuals' physical but also psychological health, **increasing the probability of developing mental health problems.**
- The exposure of population to the substantial psychosocial stress that the COVID-19 represents seems to lead them to experience **especially among women, younger people and with lower resilience capacity [1-7]:**
  - **Lower feelings of life satisfaction and**
  - **Higher levels of state anxiety and death anxiety.**

**Despite their usefulness in intervention terms, data at this level on Spanish residents are still scarce.**

# OBJECTIVE

**To explore**  
the relations among age,  
gender, levels of resilience  
and mental health in Spanish  
adults

# MATERIALS AND METHODS

## *Participants and procedure*

195 Spanish residents

Mean age 27.97 years (SD = 12.56, range = 18–60)

Gender

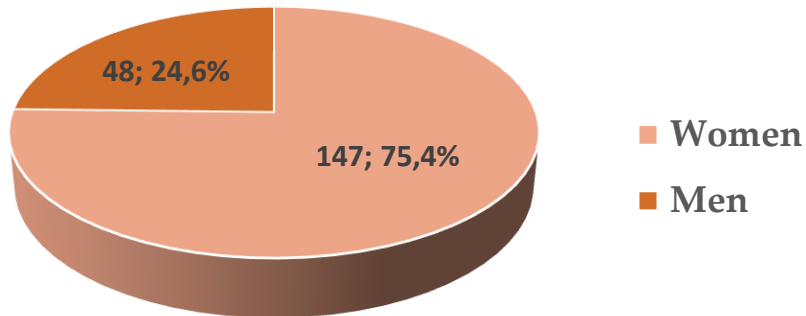

Cross-sectional study  
Conducted within three months from  
the state of alarm declared in Spain on  
March 14, 2020  
Self report questionnaire

# MATERIALS AND METHODS

## *Measures*

### Dependent variables, Spanish versions of [8-11]:

1. Satisfaction with Life Scale (SWLS). 5 items, 7-point scale (1 = Completely disagree to 7 = Completely agree).  $\alpha = 0.86$ .
2. State-Trait Anxiety Inventory (STAI). 8 items, 5-point scale (0 = Not at all to 4 = Almost always) to measure trait anxiety as well state anxiety.  $\alpha = 0.71$  (for both measures).
3. The Death Obsession Scale (DOS), 4 items, 5-point Likert response format (1 = Not at all to 5 = Very much) to answer about death anxiety.  $\alpha = 0.87$ .
4. The Connor-Davidson Resilience Scale (CD-RSIC), 10 items scored on a 5-point scale (0 = Not at all to 4 = Almost always).  $\alpha = 0.91$ .

### Independent variables

**AGE** three categories:

**Emerging** adults (from 18 to 27 years old inclusive)

**Early** adults (from 28 to 44 years old inclusive) y

**Middle** adults (from 45 to 60 years old inclusive, group 3)

**GENDER:** Men/Women

# RESULTS

## *Descriptive: Socio-demographic characteristics by gender and age*

|           |                 | N   | %    |
|-----------|-----------------|-----|------|
| Gender    | Women           | 147 | 75.4 |
|           | Men             | 48  | 24.6 |
| Age Group | Emerging adults | 142 | 72.8 |
|           | Early adults    | 15  | 7.7  |
|           | Middle adults   | 38  | 18.5 |

# RESULTS

## *Kruskal-Wallis H test (Dunn-Bonferroni post hoc test)*

Life satisfaction

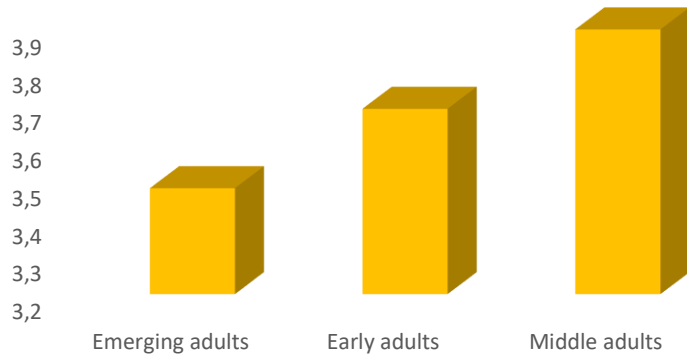

$\chi^2 = 9.29$ ;  $p \leq 0.01$ ; Post-hoc 1<3

Trait anxiety

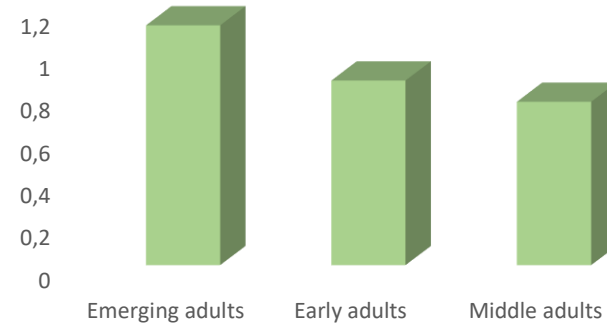

$\chi^2 = 10.45$ ;  $p \leq 0.01$ ; Post-hoc 1>3

State anxiety

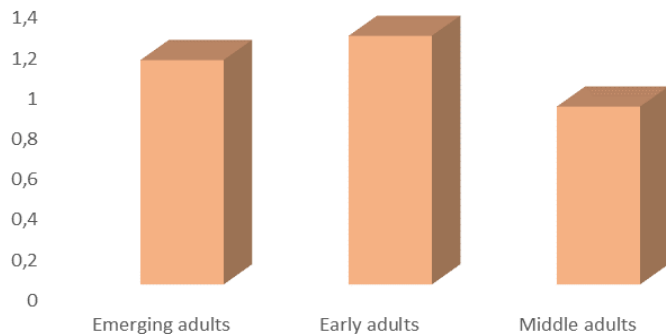

$\chi^2 = 6.96$ ;  $p \leq 0.05$ ; Post-hoc 1>3

Death anxiety

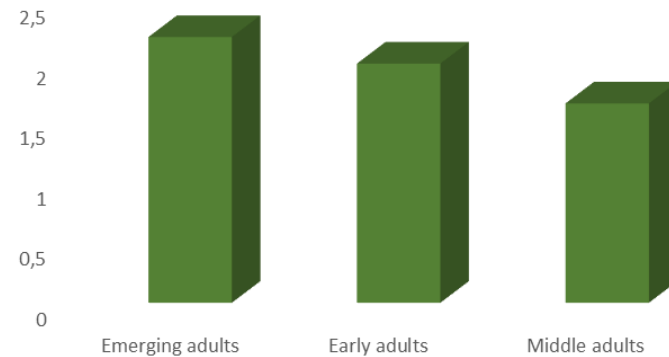

$\chi^2 = 12.14$ ;  $p \leq 0.01$ ; Post-hoc 1>3

# RESULTS

## *Mann-Whitney U test*

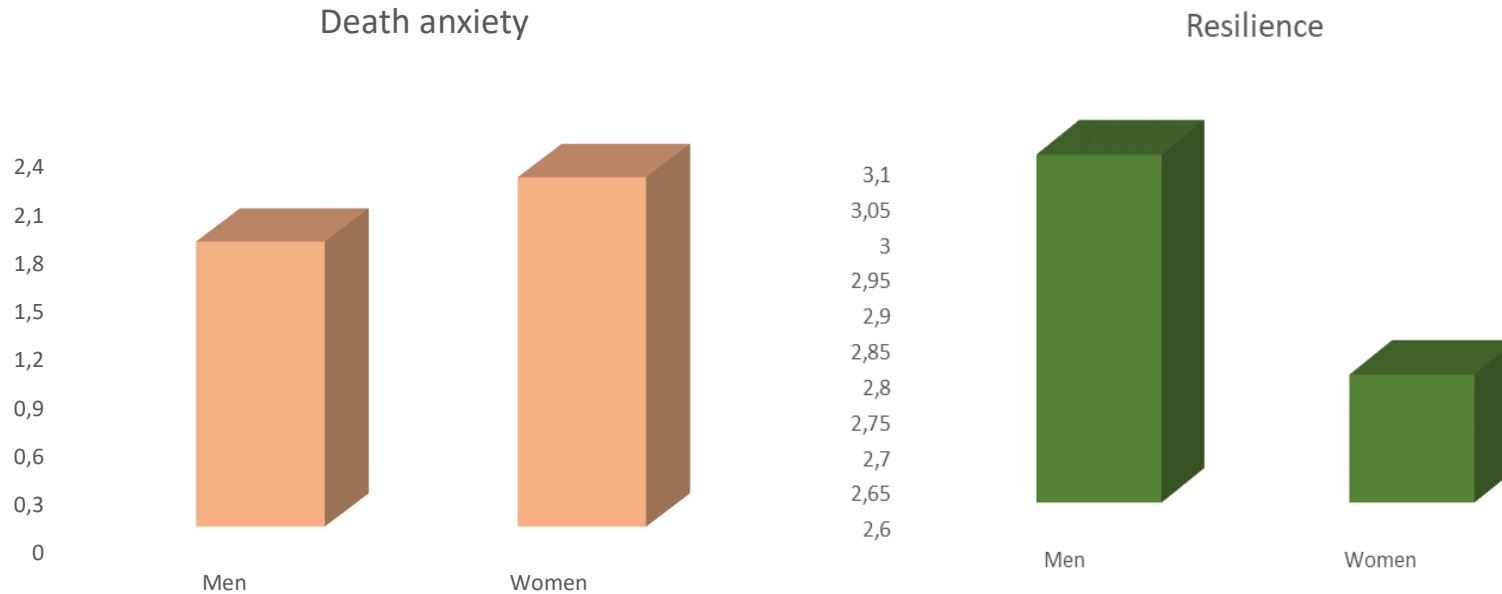

**U= 4469.50;  $p \leq 0.01$**

**U= 2926.0;  $p \leq 0.01$**

Comparing within each age group between men and women the Mann-Whitney U test showed:

- Death anxiety were greater for the youngest women ( $M = 2.26$ ;  $p \leq 0.05$ ).

- Emerging ( $M = 2.75$ ;  $p < 0.01$ ) and early adult women ( $M = p \leq 0.05$ ) were less resilient.



# DISCUSSION AND CONCLUSIONS

- **Younger adults** (emerging) **experienced higher levels of anxiety** (both trait and state) and **death anxiety**, as well as **lower life satisfaction**.
- **Death anxiety was greater for women** than for men, as well as females, especially the **youngest ones**, were **low resilient** than men.
- In line with previous evidence [2-7], the findings obtained offer support for the consideration that the mental health of women and **young people** has been **more affected** during COVID-19 pandemic.
- In this sense, that **truly relevant personal resource that constitutes resilience** becomes even **more key** if possible. **Strengthening** this important protective factor of mental health **seems crucial** in the case of **younger women**.
- Despite this **study is not without limitations** (e. g. its cross-sectional nature, non-proportional representation of participants in each gender and age group), the **results obtained are of value** for the design and development of **interventions** at this level.

# REFERENCES

- [1]. Fiorillo, A.; Gorwood, P. The consequences of the COVID-19 pandemic on mental health and implications for clinical practice. *Eur. Psychiatry*, **2000**, *63*, 1–2. <https://doi.org/10.1192/j.eurpsy.2020.35>.
- [2]. Xiong, J.; Lipsitz, O.; Nasri, F.; Lui, L. M.; Gill, H.; Phan, L., ...; McIntyre, R. S. (2020). Impact of COVID-19 pandemic on mental health in the general population: A systematic review. *J. Affect. Disord.*, **2020**, *277*, 55–64. <https://doi.org/10.1016/j.jad.2020.08.001>.
- [3]. Pierce, M.; Hope, H.; Ford, T.; Hatch, S.; Hotopf, M.; John, A., ...; Abel, K. M. Mental health before and during the COVID-19 pandemic: a longitudinal probability sample survey of the UK population. *Lancet*, **2020**, *7*, 883–892. [https://doi.org/10.1016/S2215-0366\(20\)30308-4](https://doi.org/10.1016/S2215-0366(20)30308-4).
- [4]. Bidzan-Bluma, I.; Bidzan, M.; Jurek, P.; Bidzan, L.; Knietzsch, J.; Stueck, M.; Bidzan, M. A Polish and German Population Study of Quality of Life, Well-Being, and Life Satisfaction in Older Adults During the COVID-19 Pandemic. *Front. Psychiatry* **2020**, *11*:585813. <https://doi.org/10.3389/fpsy.2020.585813>.
- [5]. Kavčič, T.; Avsec, A.; Zager Kocjan, G. Psychological Functioning of Slovene Adults during the COVID-19 Pandemic: Does Resilience Matter? *Psychiatr Q* **2020**, online ahead of print. <https://doi.org/10.1007/s11126-020-09789-4>.
- [6]. Luceño-Moreno, L.; Talavera-Velasco, B.; García-Albuérne, Y.; Martín-García, J. Symptoms of Posttraumatic Stress, Anxiety, Depression, Levels of Resilience and Burnout in Spanish Health Personnel during the COVID-19 Pandemic. *Int. J. Environ. Res. Public Health* **2020**, *17*, 5514. <https://doi.org/10.3390/ijerph17155514>.
- [7]. Alcover, C.M.; Rodríguez, F.; Pastor, Y.; Thomas, H.; Rey, M.; Del Barrio, J.L. Group Membership and Social and Personal Identities as Psychosocial Coping Resources to Psychological Consequences of the COVID-19 Confinement. *Int. J. Environ. Res. Public Health* **2020**, *17*, 7413 <https://doi.org/10.3390/ijerph17207413>.
- [8]. Atienza, F.L.; Pons, D.; Balaguer, I.; Merita, M.G. Propiedades psicométricas de la Escala de Satisfacción con la Vida en adolescentes. *Psicothema* **2000**, *12*, 314–319.
- [9]. Buela-Casal, G.; Guillén-Riquelme, A. Short form of the Spanish adaptation of the State-Trait Anxiety Inventory. *Int J Clin Health Psychol* **2017**, *17*, 261–268. <http://dx.doi.org/10.1016/j.ijchp.2017.07.003>.
- [10]. Tomás-Sábado, J.; Gómez-Benito, J. Psychometric properties of the Spanish adaptation of the Death Obsession Scale (DOS). *OMEGA (Westport)* **2003**, *46*, 263–272. <https://doi.org/10.2190/4B2C-MK8J-X8YJ-9X4M>.
- [11]. Notario-Pacheco, B.; Solera-Martínez, M.; Serrano-Parra, M.D.; Bartolomé-Gutiérrez, R.; García-Campayo, J.; Martínez-Vizcaíno, V. Reliability and validity of the Spanish version of the 10-item Connor-Davidson Resilience Scale (10-item CD-RISC) in young adults. *Health Qual. Life Outcomes* **2011**, *9*, 63–68. <https://doi.org/10.1186/1477-7525-9-63>.
